# Supplementary material for: A label-free G-quadruplex aptamer fluorescent aptasensor for visual and real-time kanamycin detection in lake and human samples
Source: Royal Society of Chemistry journal article supplement (doi:10.1039/d2an01810a), 2022-12-03
Supplement: d2an01810a1.pdf [file d2an01810a1.pdf]

## Supporting Information

### **Label-free G-quadruplex aptamer fluorescent aptasensor for visual and real-time kanamycin detection in the lake and human samples**

Yingnan Ma<sup>a</sup>, Gang Shen<sup>b\*</sup>, Runzhi Li<sup>a</sup>, Changzheng Wang<sup>a\*</sup>, Fengmin Yang<sup>b</sup>, Fangfang Wang<sup>b</sup>, Huanfeng Ye<sup>b</sup>, Hong Zhang<sup>b\*</sup>, Yalin Tang<sup>b,c\*</sup>

<sup>a</sup> Key Laboratory of Urban Stormwater System and Water Environment, Ministry of Education, Beijing University of Civil Engineering and Architecture, Beijing 100044, China

<sup>b</sup> National Laboratory for Molecular Sciences, Center for Molecular Sciences, State Key Laboratory for Structural Chemistry of Unstable and Stable Species, Institute of Chemistry Chinese Academy of Sciences, Beijing 100190, China

<sup>c</sup> University of Chinese Academy of Sciences, Beijing 100049, China

\* Corresponding authors

E-mail: sg2009@iccas.ac.cn, zhanghong@iccas.ac.cn, wcz@bucea.edu.cn, tangyl@iccas.ac.cn

Fax: 0086-10-8261-7302

Tel: 0086-10-6256-3101

---

## Table of content

|                                                                                                                             |            |
|-----------------------------------------------------------------------------------------------------------------------------|------------|
| MS-ESI spectrum of <b>CyT</b> -----                                                                                         | <b>S3</b>  |
| <sup>1</sup> H-NMR spectrum of <b>CyT</b> -----                                                                             | <b>S4</b>  |
| <sup>13</sup> C-NMR spectrum of <b>CyT</b> -----                                                                            | <b>S5</b>  |
| CD spectra of <b>KANA-aptamer</b> in different solution upon addition of <b>KANA</b> -----                                  | <b>S6</b>  |
| UV-vis absorption spectra of <b>CyT</b> upon addition of <b>KANA-aptamer</b> and <b>KANA</b> --                             | <b>S7</b>  |
| Photographs of samples under UV lamp at different times-----                                                                | <b>S8</b>  |
| FL spectra of <b>CyT</b> in different buffer solutions-----                                                                 | <b>S9</b>  |
| UV-vis absorption spectra of <b>CyT</b> with different <b>K<sup>+</sup></b> concentrations -----                            | <b>S10</b> |
| FL spectra of <b>CyT</b> with different <b>KANA-aptamer</b> concentrations in the absence and presence of <b>KANA</b> ----- | <b>S11</b> |
| The reported G-rich sequences of antibiotic aptamers -----                                                                  | <b>S12</b> |
| Determination of <b>KANA</b> concentration in lake water and urine by proposed method and standard HPLC-ELSD-----           | <b>S13</b> |
| Comparison with the reported methods for <b>KANA</b> determination -----                                                    | <b>S13</b> |

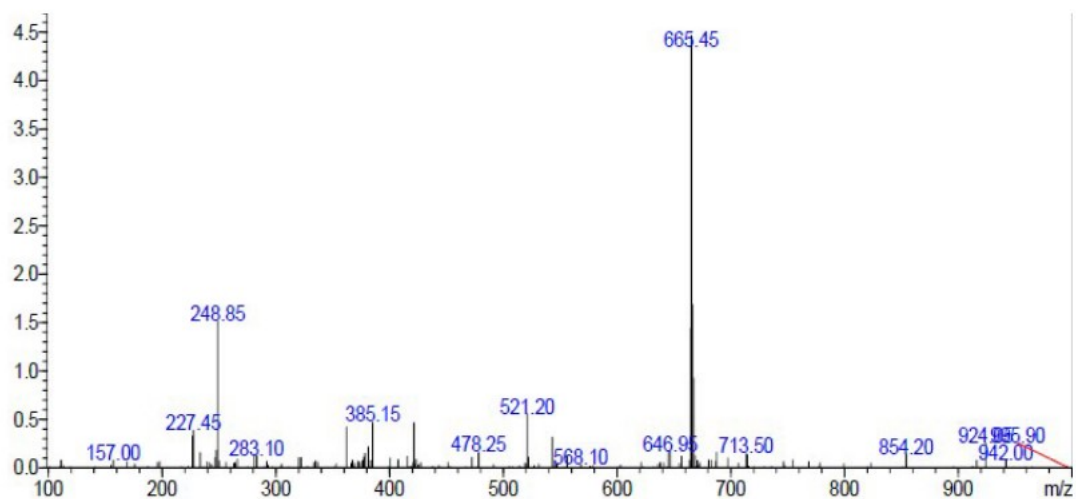

**Fig. S1.** MS-ESI spectrum of CyT.

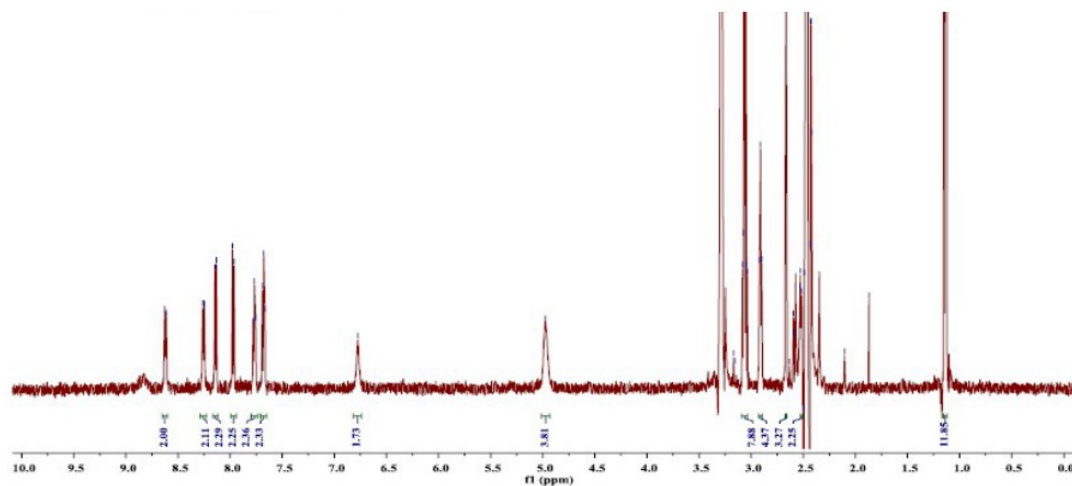

**Fig. S2.**  $^1\text{H-NMR}$  spectrum of cyanine dye CyT in  $\text{DMSO-d}_6$ .  $\delta^1\text{H}$ : 8.63–8.61 (d, 2H), 8.26–8.25 (d, 2H), 8.15–8.13 (d, 2H), 7.98–7.96 (d, 2H), 7.77 (t, 2H), 7.68 (t, 2H), 6.78 (s, 2H), 4.97 (s, 2H), 3.06 (m, 8H), 2.91 (t, 4H), 2.67 (s, 3H,  $\text{CH}_3$ ), 2.51 (s, 2H), 1.14 (s, 12H) ppm.

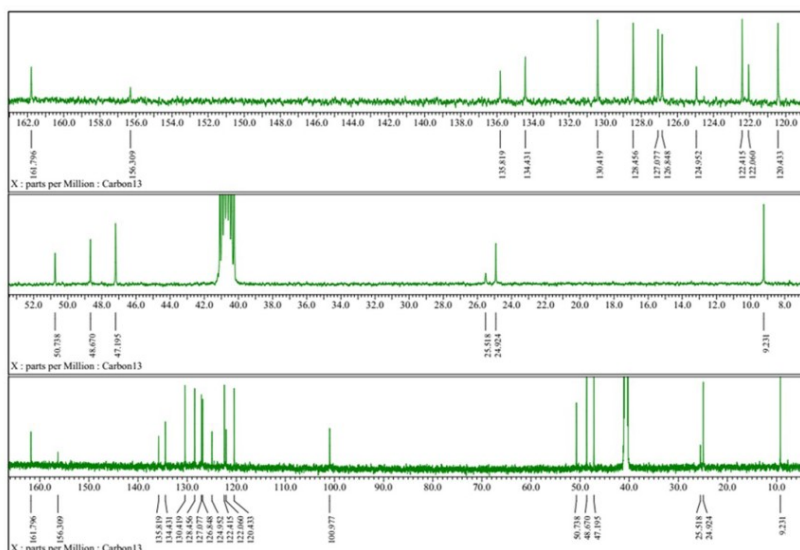

**Fig. S3.**  $^{13}\text{C}$ -NMR spectrum of CyT in DMSO- $d_6$ .  $\delta$  161.80, 156.31, 135.82, 134.43, 130.42, 128.46, 127.08, 126.85, 124.95, 122.41, 122.06, 120.43, 100.98, 50.74, 48.67, 47.20, 25.52, 24.92, 9.23.

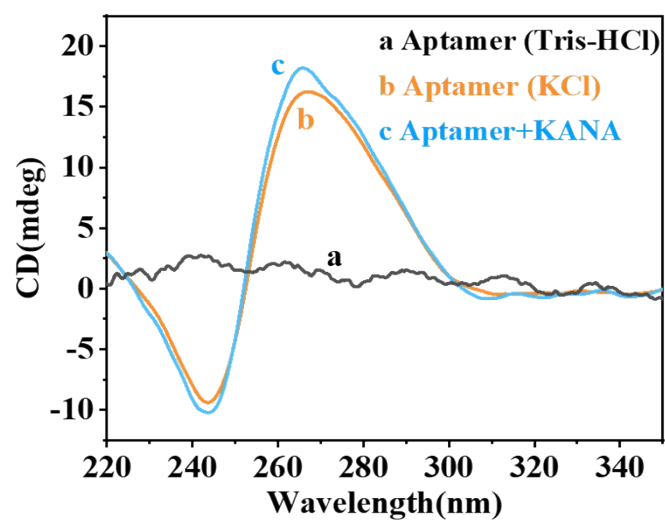

**Fig. S4.** The CD spectra of (a) KANA-aptamer in 20 mM Tris-HCl, (b) KANA-aptamer in 5 mM KCl, (c) KANA aptamer+KANA in 5 mM KCl. The concentrations of KANA-aptamer and KANA were 3.0  $\mu\text{M}$ , 0.6  $\mu\text{M}$ , respectively.

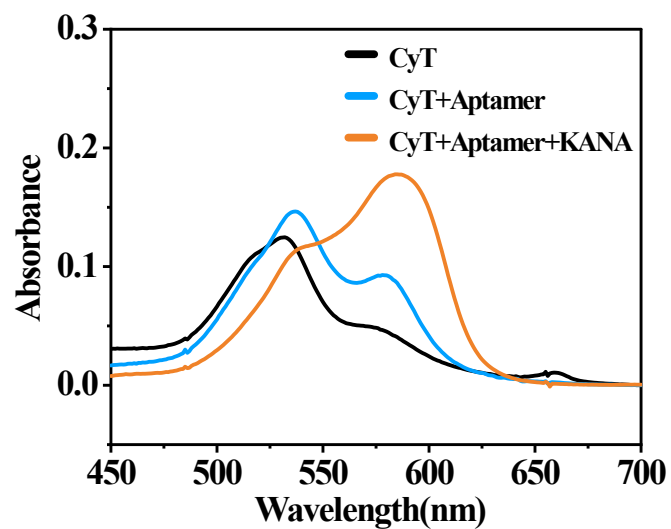

**Fig. S5.** The absorption spectra of CyT upon addition of KANA-aptamer and KANA. The concentrations of CyT, KANA-aptamer and KANA were 2.0  $\mu\text{M}$ , 2.0  $\mu\text{M}$ , 5.0  $\mu\text{M}$ , respectively.

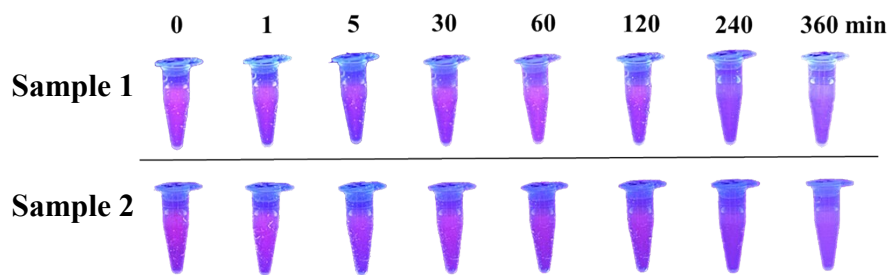

**Fig. S6.** Photographs of samples under UV lamp (302 nm) at different times. The concentrations of KANA were 0.6 $\mu$ M.



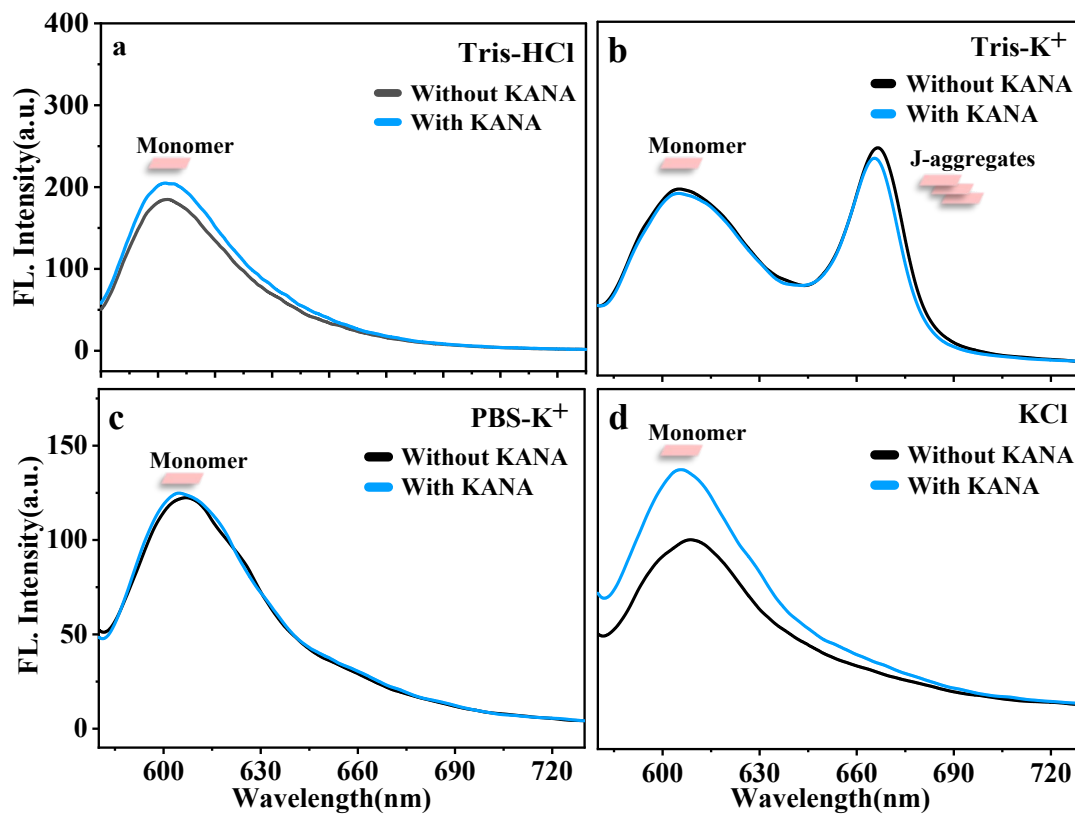

**Fig. S7.** Fluorescence spectra of CyT in different buffer solutions with (blue) or without (black) KANA (0.2  $\mu\text{M}$ ). (a) 20 mM Tris-HCl, (b) Tris-K<sup>+</sup> (20 mM Tris-HCl and 5 mM KCl), (c) PBS-K<sup>+</sup> (5 mM K<sup>+</sup>), (d) 5 mM KCl.

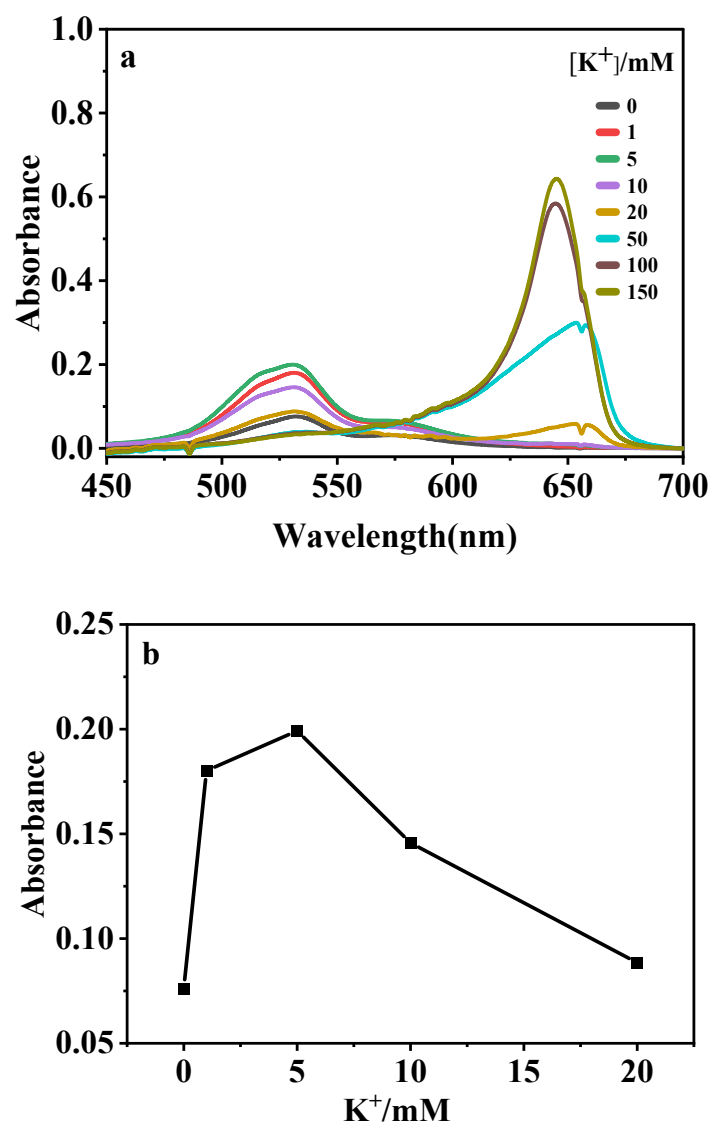

**Fig. S8.** a) The absorption spectra of 4 μM CyT with increasing concentrations of K<sup>+</sup>. b) The plot of the absorbance at 532 nm of 4 μM CyT versus [K<sup>+</sup>].

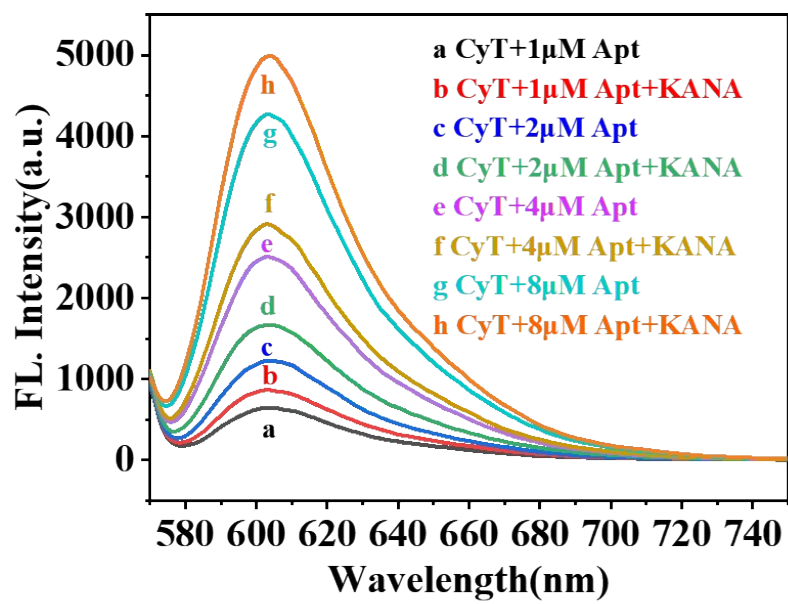

**Fig. S9.** The fluorescence spectra of 2  $\mu$ M CyT with various concentrations of KANA-aptamer in the absence and presence of KANA.

**Table S1 The reported G-rich sequence of antibiotic aptamers**

| <b>Antibiotic Classes</b> | <b>Antibiotics</b>         | <b>Aptamer sequence 5'→3'</b>                                                                                                             | <b>Confor-mation</b>                                                                                        | <b>Ref.</b> |
|---------------------------|----------------------------|-------------------------------------------------------------------------------------------------------------------------------------------|-------------------------------------------------------------------------------------------------------------|-------------|
| Tetracyclines             | Tetracycline               | CGT ACG GAA TTC GCT AGC CCC CCG GCA GGC<br>CAC GGC TTG GGT TGG TCC CAC TGC GCG TGG<br>ATC CGA GCT CCA CGT G<br>TGGGTAGGGCGGGTTGGGA        | Antiparallel G4                                                                                             | [1]         |
|                           |                            | CGGTGGTG                                                                                                                                  | -                                                                                                           | [2]         |
|                           |                            |                                                                                                                                           |                                                                                                             | [3]         |
|                           | Oxytetracycline            | CGTACGGAATTCGCTAGCCGAGTTGAGCCGGGCGC<br>GGTACGGGTACTGGTATGTGTGGGGATCCGAGCTC<br>CACGTG                                                      | -                                                                                                           | [4]         |
| Quinolones                | Ofloxacin<br>Ciprofloxacin | ATA CCA GCT TAT TCA ATT AGT TGT GTA TTG<br>AGG TTT GAT CTA GGC ATA GTC AAC AGA GCA<br>CGATCG ATC TGG CTTGTT CTA CAA TCG TAA<br>TCA GTT AG | Parallel G4                                                                                                 | [5][6]      |
|                           |                            | Enrofloxacin                                                                                                                              | CCC ATC AGG GGG CTA GGC TAA CAC GGT TCG<br>GCT CTC TGA GCC CGG GTT ATT TCA GGG GGA<br>TGGGGGTTGAGGCTAAGAAGA | G-rich      |
|                           | Kanamycin                  |                                                                                                                                           | Parallel G4                                                                                                 | [8]         |
|                           |                            |                                                                                                                                           | TGG GGG TTG AGG CTA AGC CGA CCA TGT ACT<br>TTT                                                              | G-rich      |
| Aminoglycosides           | Tobramycin                 | GGG ACT TGG TTT AGG TAA TGA GTC CC<br>GA CTA GGC ACT AGT C                                                                                | G-rich                                                                                                      | [10]        |
|                           |                            |                                                                                                                                           |                                                                                                             | [11]        |
|                           | Gentamicin                 | GGG ACT TGG TTT AGG TAA TGA GTC CC                                                                                                        | G-rich                                                                                                      | [12]        |
|                           | Streptomycin               | GGGGTCTGGTGTCTGCTTTGTTCTGTCGGGTCGT                                                                                                        | G-rich                                                                                                      | [13]        |
| Sulfonamides              | Sulfame/thiazine           | TTA GCT TA T GCG TTG GCC GGG A TA AGG A TC<br>CAG CCG TTG TAG A TT TGC GTT CTA ACT CTC                                                    | -                                                                                                           | [14]        |
| β-Lactams                 | Ampicillin                 | GCGGGCGGTTGTA TAGCGG                                                                                                                      | G-rich                                                                                                      | [15]        |
|                           | Penicillin                 | TTA GTT GGG GTT CAG TTG G<br>GGGTCTGAGGAGTGCGCGGTGCCAGTGAGT                                                                               | G-rich                                                                                                      | [16]        |
| Anthracyclines            | Chloramphenicol            | ACT TCA GTG AGT TGT CCC ACG GTC GGC GAG<br>TCG GTG GTA G                                                                                  | G-rich                                                                                                      | [17]        |
|                           |                            |                                                                                                                                           |                                                                                                             | [18]        |

**Table S2 Determination of KANA concentration in lake water and urine by proposed method and standard HPLC-ELSD<sup>a</sup>**

|                   | <b>Sample</b> | <b>Proposed method *</b> | <b>HPLC-ELSD *</b> |
|-------------------|---------------|--------------------------|--------------------|
| <b>Lake water</b> | <b>1</b>      | Not detected             | Not detected       |
|                   | <b>2</b>      | Not detected             | Not detected       |
| <b>Urine</b>      | <b>1</b>      | Not detected             | Not detected       |
|                   | <b>2</b>      | Not detected             | Not detected       |

\* Average value of three determinations  $\pm$  standard deviation

<sup>a</sup>The standard HPLC-ELSD method as described in the Chinese pharmacopoeia

**Table S3 Comparison with the reported methods for KANA determination**

| <b>Detection method</b> | <b>LOD</b>   | <b>Linear range</b> | <b>Application</b>  | <b>Ref.</b> |
|-------------------------|--------------|---------------------|---------------------|-------------|
| HPLC                    | 1.23 nM      | 10-31 $\mu$ M       | -                   | [19]        |
| ELISA                   | 0.4 nM       | 0.4-6.0 nM          | Fc fusion protein   | [20]        |
| CE                      | 0.83 $\mu$ M | 4.0-65 $\mu$ M      | -                   | [21]        |
| FRET                    | 1.1 $\mu$ M  | 4-25 $\mu$ M        | milk                | [22]        |
| Fluorescent             | 1.05 nM      | 50-2000 nM          | pork, chicken, beef | [23]        |
| Electrochemical         | 0.06 nM      | 0.1-60 nM           | honey               | [24]        |
| Electrochemical         | 0.23 nM      | 2.5-155 nM          | milk                | [25]        |
| Luminescence            | 143 nM       | 0.2-150 $\mu$ M     | fish                | [26]        |
| Colorimetric            | 0.06 $\mu$ M | 0.1-0.5 $\mu$ M     | honey, milk, pork   | [27]        |
| Colorimetric            | 0.68 $\mu$ M | 1-40 $\mu$ M        | milk                | [28]        |
| Fluorescent             | 43 nM        | 0.1-1 $\mu$ M       | lake water, urine   | This work   |

### References

- [1] YANG C, BIE J, ZHANG X, et al. A label-free aptasensor for the detection of tetracycline based on the luminescence of SYBR Green I. *Spectrochim Acta A Mol Biomol Spectrosc*, 2018, 202: 382-388.
- [2] TANG Y, HUANG X, WANG X, et al. G-quadruplex DNAzyme as peroxidase mimetic in a colorimetric biosensor for ultrasensitive and selective detection of trace tetracyclines in foods. *Food Chem*, 2022, 366: 130560.

- 
- [3] LIU S, DING J, QIN W. Dual-Analyte Chronopotentiometric Aptasensing Platform Based on a G-Quadruplex/Hemin DNAzyme and Logic Gate Operations. *Anal Chem*, 2019, 91(4): 3170-3176.
- [4] ZHAO H, GAO S, LIU M, et al. Fluorescent assay for oxytetracycline based on a long-chain aptamer assembled onto reduced graphene oxide. *Microchimica Acta*, 2013, 180(9-10): 829-835.
- [5] YI H, YAN Z, WANG L, et al. Fluorometric determination for ofloxacin by using an aptamer and SYBR Green I. *Mikrochim Acta*, 2019, 186(10): 668.
- [6] HU X, WEI P, CATANANTE G, et al. Ultrasensitive ciprofloxacin assay based on the use of a fluorescently labeled aptamer and a nanocomposite prepared from carbon nanotubes and MoSe<sub>2</sub>. *Mikrochim Acta*, 2019, 186(8): 507.
- [7] CHEN J, JIN Y, REN T, et al. A novel terbium (III) and aptamer-based probe for label-free detection of three fluoroquinolones in honey and water samples. *Food Chem*, 2022, 386: 132751.
- [8] MA L, SUN N, TU C, et al. Design of an aptamer-based fluorescence displacement biosensor for selective and sensitive detection of kanamycin in aqueous samples. *RSC Advances*, 2017, 7(61): 38512-38518.
- [9] ZHOU W, XU L, JIANG B. Target-initiated autonomous synthesis of metal-ion dependent DNAzymes for label-free and amplified fluorescence detection of kanamycin in milk samples. *Anal Chim Acta*, 2021, 1148: 238195.
- [10] MAHJUB R, SHAYESTE H, DERAKHSHANDEH K, et al. A novel label-free colorimetric polyA aptasensing approach based on cationic polymer and silver nanoparticles for detection of tobramycin in milk. *Food Chem*, 2022, 382: 132580.
- [11] OU Y, JIN X, FANG J, et al. Multi-cycle signal-amplified colorimetric detection of tobramycin based on dual-strand displacement and three-way DNA junction. *Microchemical Journal*, 2020, 156: 104823.
- [12] RAMALINGAM S, COLLIER C M, SINGH A. A Paper-Based Colorimetric Aptasensor for the Detection of Gentamicin. *Biosensors (Basel)*, 2021, 11(2):
- [13] ZHOU N, WANG J, ZHANG J, et al. Selection and identification of streptomycin-specific single-stranded DNA aptamers and the application in the detection of streptomycin in honey. *Talanta*, 2013, 108: 109-116.
- [14] HE B, LI M, LI M. Electrochemical determination of sulfamethazine using a gold electrode modified with multi-walled carbon nanotubes, graphene oxide nanoribbons and branched aptamers. *Mikrochim Acta*, 2020, 187(5): 274.
- [15] ZHANG R, WANG Y, QU X, et al. Exonuclease III-powered DNA Walking Machine for Label-free and Ultrasensitive Electrochemical Sensing of Antibiotic. *Sensors and Actuators B: Chemical*, 2019, 297:
- [16] MOHAMMAD-RAZDARI A, GHASEMI-VARNAMKHAHASTI M, IZADI Z, et al. An impedimetric aptasensor for ultrasensitive detection of Penicillin G based on the use of reduced graphene oxide and gold nanoparticles. *Mikrochim Acta*, 2019, 186(6): 372.
- [17] YU Z, CUI P, XIANG Y, et al. Developing a fast electrochemical aptasensor method for the quantitative detection of penicillin G residue in milk with high sensitivity and good anti-fouling ability. *Microchemical Journal*, 2020, 157: 105077.

- 
- [18] WAN HUANGA H Z, GUOSONG LAIA., SHUN LIUA,BOLIA, AIMIN YU. Sensitive and rapid aptasensing of chloramphenicol by colorimetric signal. *Food Chemistry*, 2019, 270: 287 - 292.
- [19] PATEL K N, LIMGAVKAR R S, RAVAL H G, et al. High-Performance Liquid Chromatographic Determination of Cefalexin Monohydrate and Kanamycin Monosulfate with Precolumn Derivatization. *Journal of Liquid Chromatography & Related Technologies*, 2014, 38(6): 716-721.
- [20] CHANG C Y, CUI Y, LI X R, et al. Determination of kanamycin residues in recombinant human thrombopoietin mimetic peptide-Fc fusion protein for injection by ELISA. *Chinese Journal of Pharmaceutical Analysis*, 2019, 39(2): 328-332.
- [21] ZHU Y, GE S, WU M, et al. Rapid Separation and Determination of Aminoglycoside Antibiotics by Capillary Electrophoresis with Contactless Conductivity Detection. *Physical Testing and Chemical Analysis (Part B:Chemical Analysis)*, 2014, 50(5): 525-529.
- [22] WANG Y, MA T, MA S, et al. Fluorometric determination of the antibiotic kanamycin by aptamer-induced FRET quenching and recovery between MoS<sub>2</sub> nanosheets and carbon dots. *Microchimica Acta*, 2016, 184(1): 203-210.
- [23] WANG C, LI J. Fluorescence method for kanamycin detection based on the conversion of G-triplex and G-quadruplex. *Anal Bioanal Chem*, 2021, 413(28): 7073-7080.
- [24] WANG C, LIU C, LUO J, et al. Direct electrochemical detection of kanamycin based on peroxidase-like activity of gold nanoparticles. *Anal Chim Acta*, 2016, 936: 75-82.
- [25] SHARMA A, ISTAMBOULIE G, HAYAT A, et al. Disposable and portable aptamer functionalized impedimetric sensor for detection of kanamycin residue in milk sample. *Sensors and Actuators B: Chemical*, 2017, 245: 507-515.
- [26] LEUNG K-H, HE H-Z, CHAN D S-H, et al. An oligonucleotide-based switch-on luminescent probe for the detection of kanamycin in aqueous solution. *Sensors and Actuators B: Chemical*, 2013, 177: 487-492.
- [27] TANG Y, HU Y, ZHOU P, et al. Colorimetric Detection of Kanamycin Residue in Foods Based on the Aptamer-Enhanced Peroxidase-Mimicking Activity of Layered WS<sub>2</sub> Nanosheets. *J Agric Food Chem*, 2021, 69(9): 2884-2893.
- [28] XU C, YING Y, PING J. Colorimetric aggregation assay for kanamycin using gold nanoparticles modified with hairpin DNA probes and hybridization chain reaction-assisted amplification. *Mikrochim Acta*, 2019, 186(7): 448.
